# Supplementary material for: Enzymatic Desymmetrisation of Prochiral Phosphines and Phosphine P-Sulfides as a Route to P-Chiral Catalysts
Source: MDPI journal article supplement (doi:10.3390/catal12020171), 2022-01-28

# SUPPORTING INFORMATION

## Enzymatic desymmetrisation of prochiral phosphines and phosphine *P*-sulfides as a route to *P*-chiral catalysts

Lidia Madalińska, Piotr Kielbasiński and Małgorzata Kwiatkowska\*

Division of Organic Chemistry, Centre of Molecular and Macromolecular Studies, Polish Academy of Sciences, Sienkiewicza 112, 90-363 Łódź, Poland

E-mail: [gosia@cbmm.lodz.pl](mailto:gosia@cbmm.lodz.pl)

## NMR SPECTRA

Bis(2-hydroxymethylphenyl)methylphosphine **12**

$^{31}\text{P}\{^1\text{H}\}$  NMR ( $\text{CDCl}_3$ , 81 MHz)

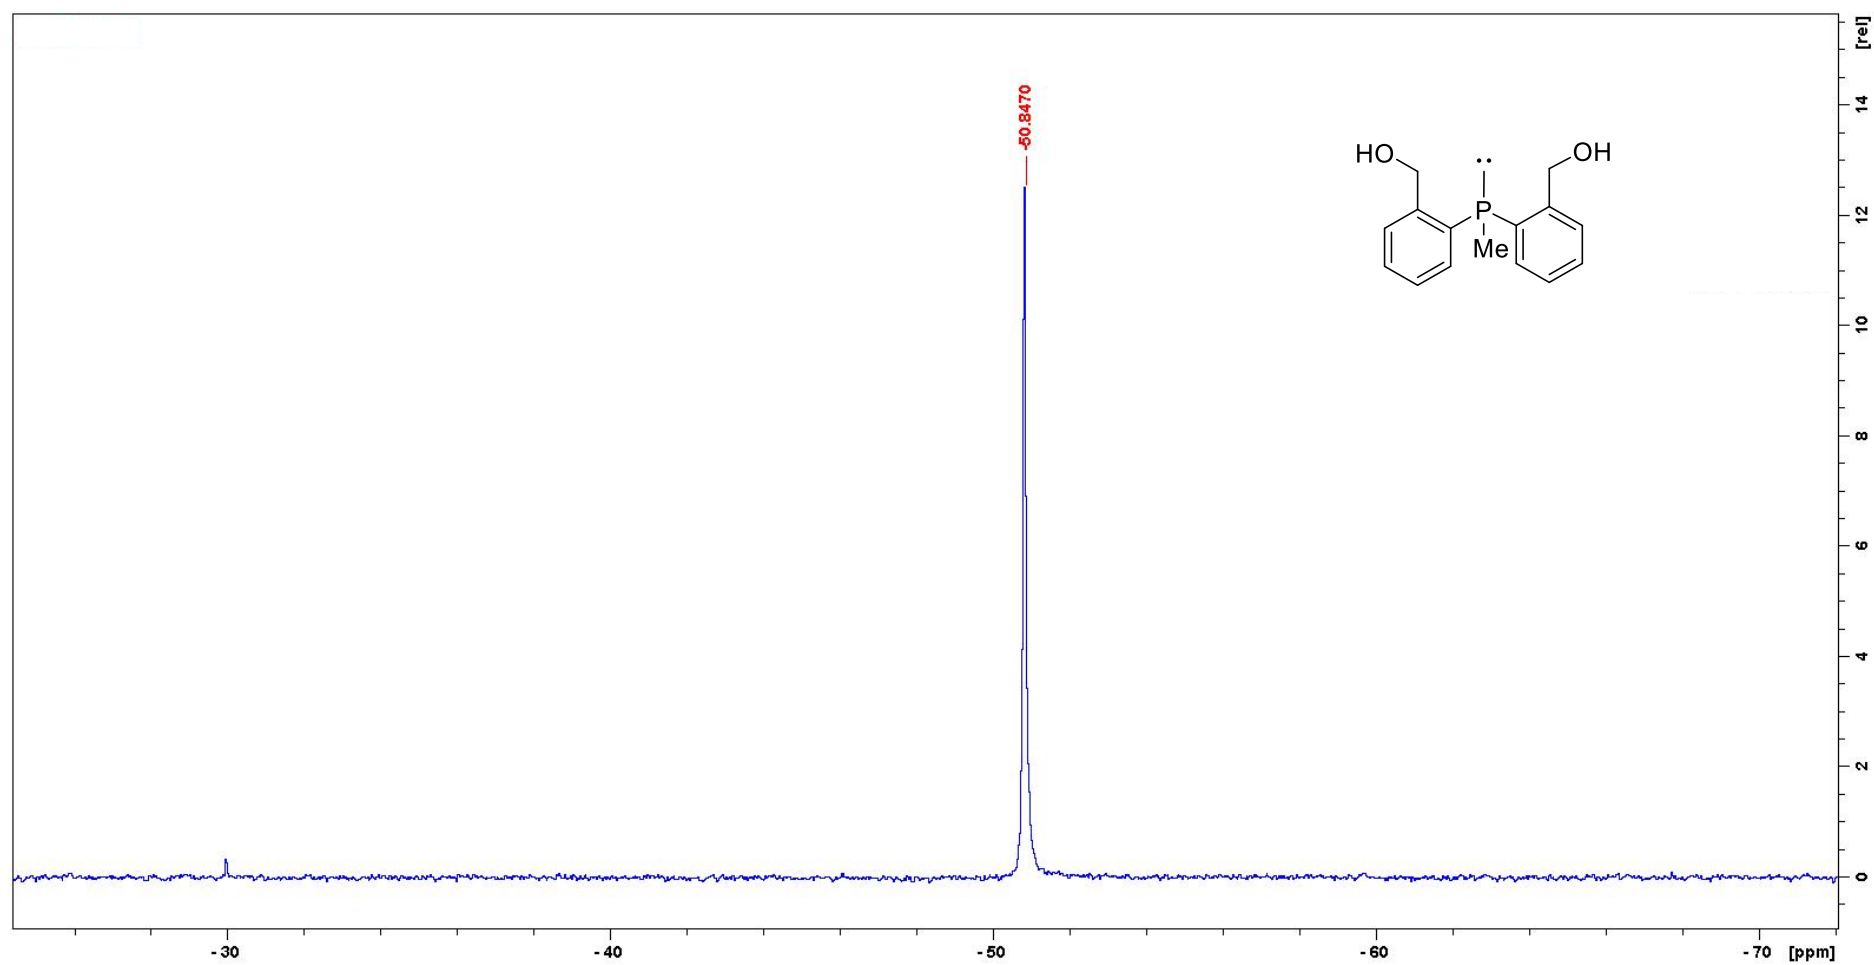

Bis(2-hydroxymethylphenyl)methylphosphine **12**

$^1\text{H}$  NMR ( $\text{CDCl}_3$ , 200 MHz)

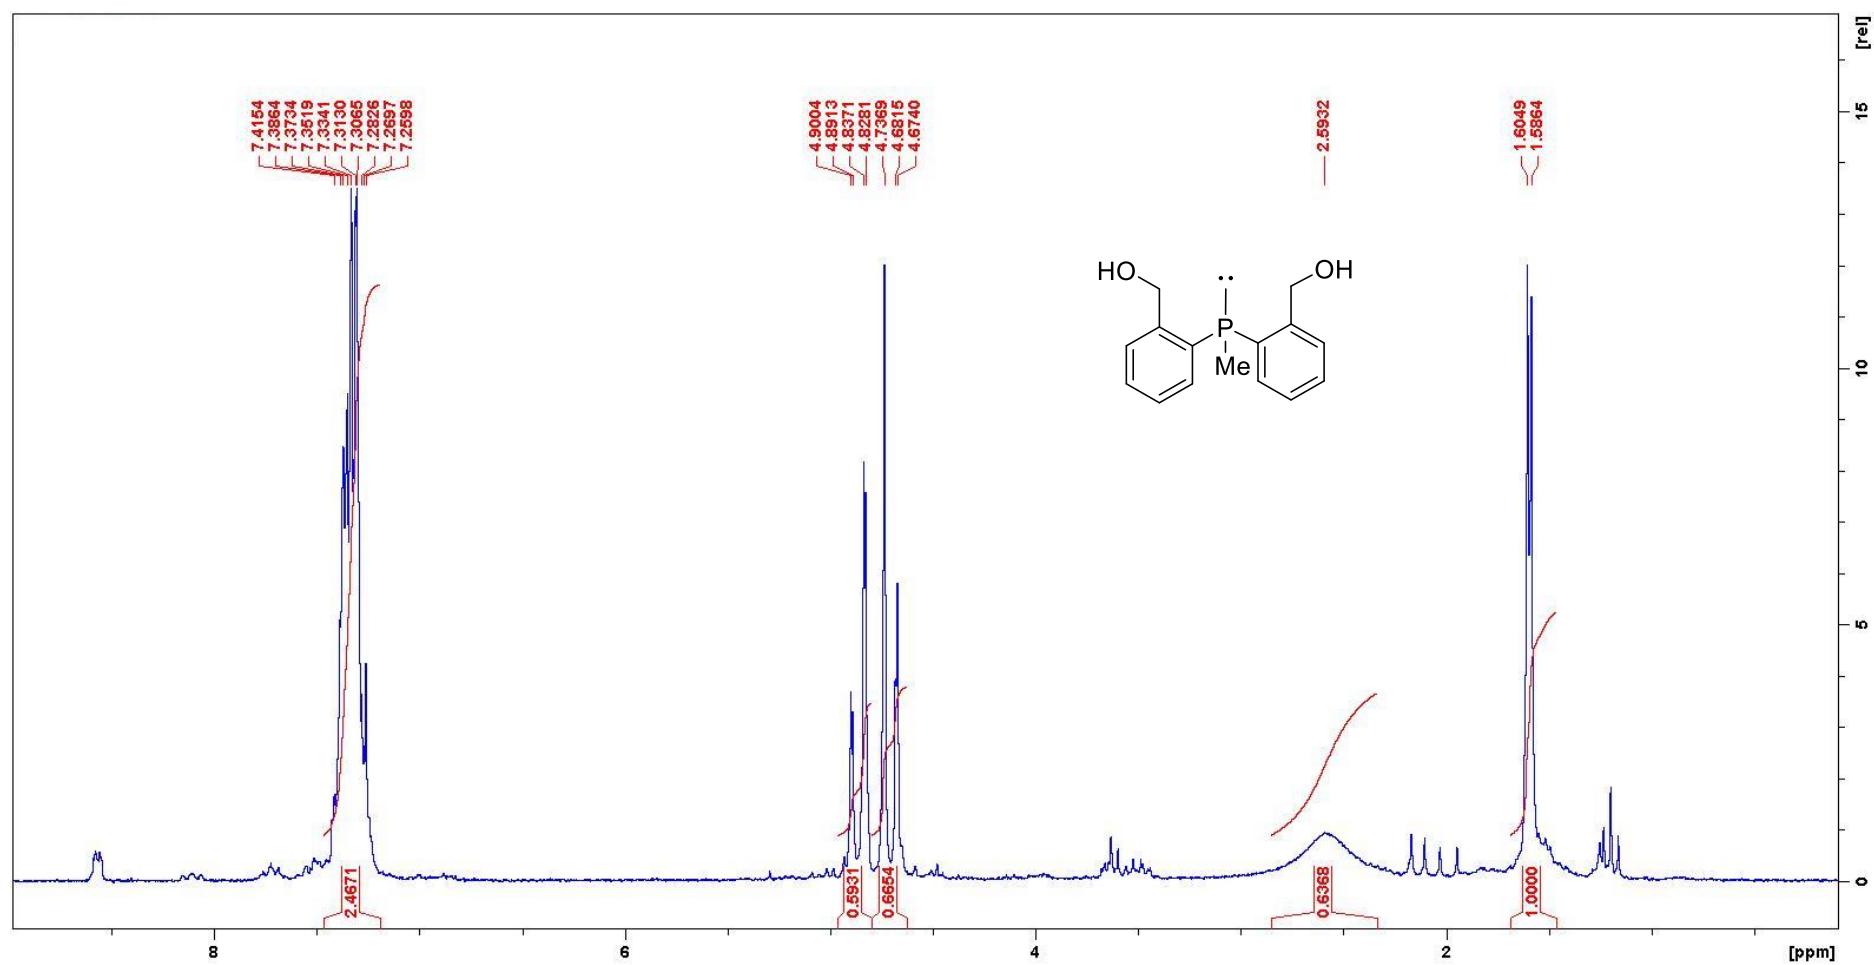

Bis(2-hydroxymethylphenyl)phenylphosphine **13**

$^{31}\text{P}\{^1\text{H}\}$  NMR ( $\text{CDCl}_3$ , 81 MHz)

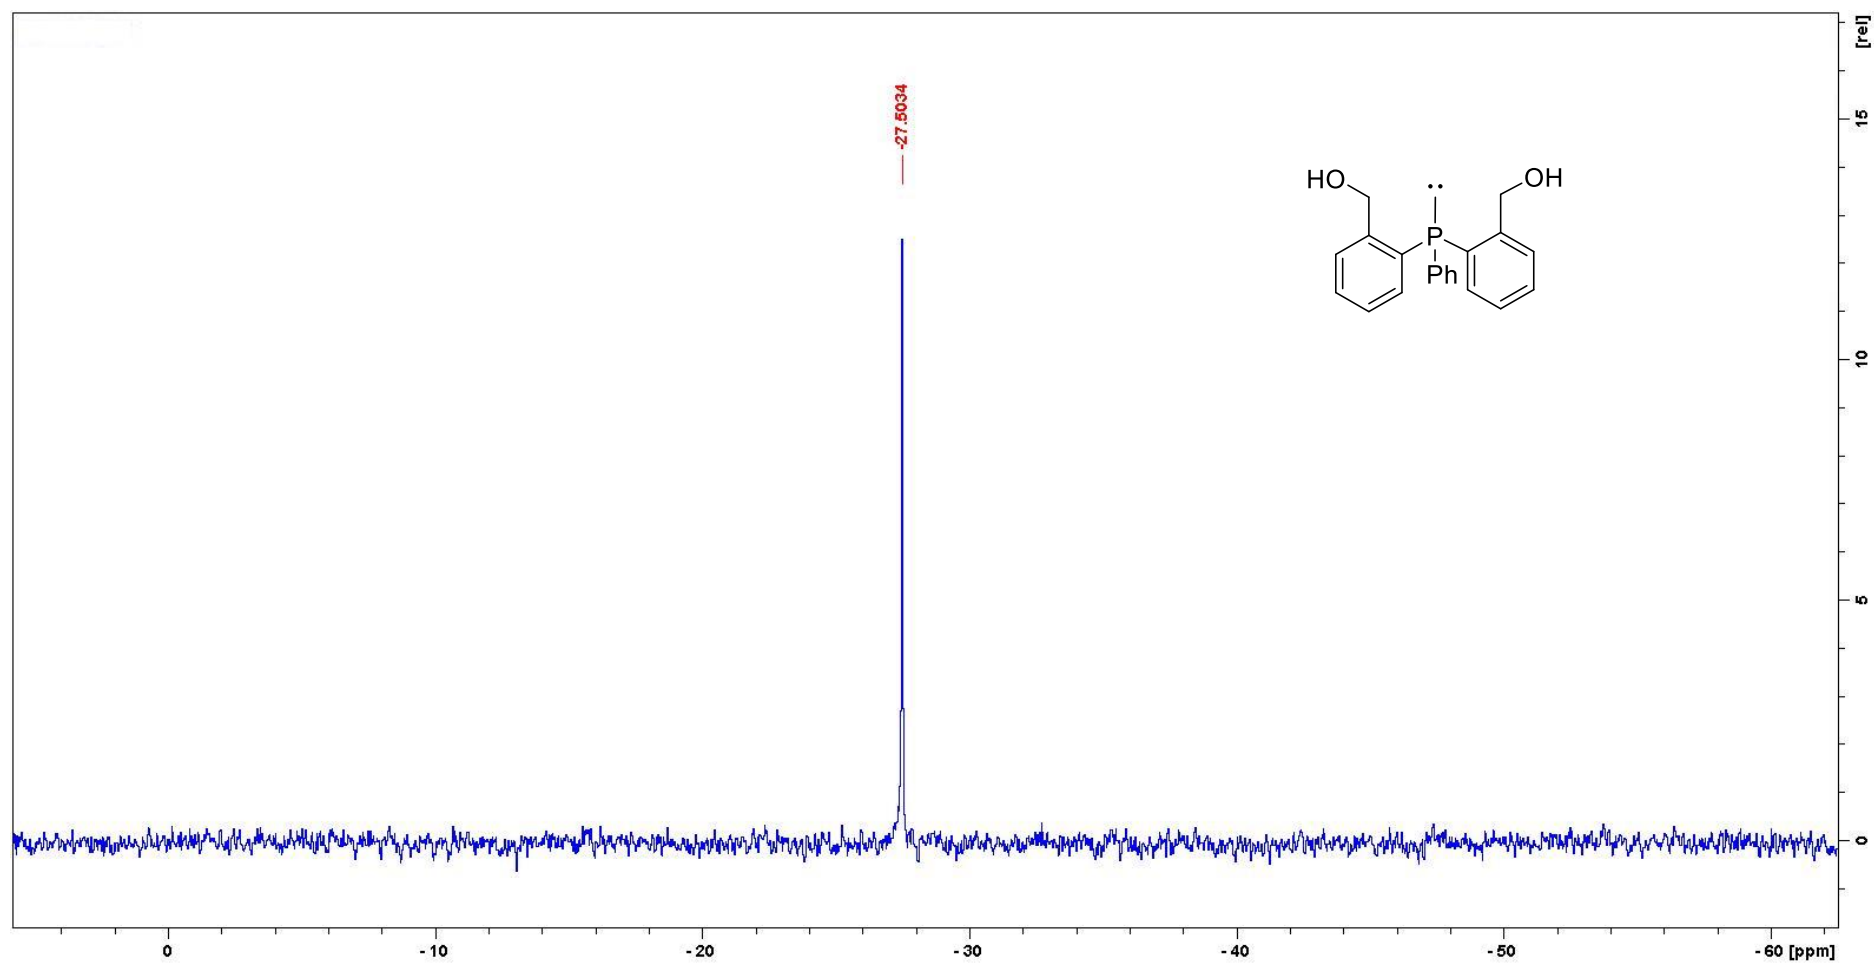

Bis(2-hydroxymethylphenyl)phenylphosphine **13**

$^1\text{H}$  NMR ( $\text{CDCl}_3$ , 200 MHz)

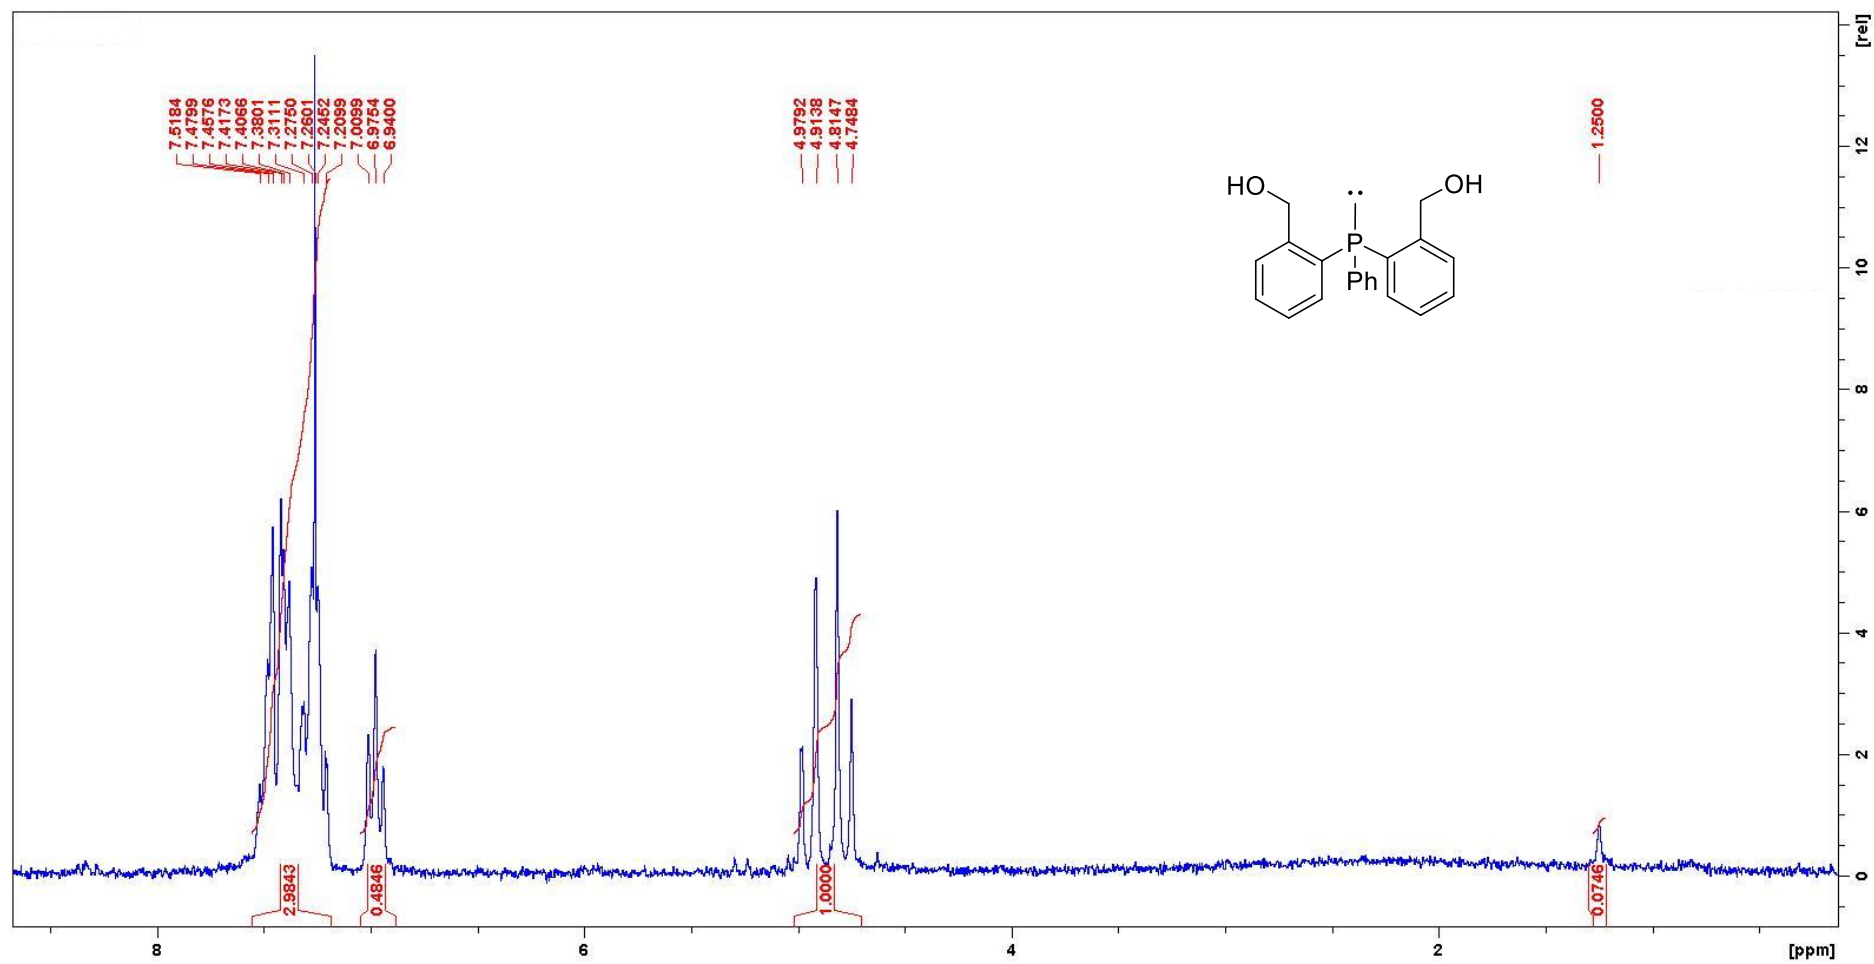

Bis(2-hydroxymethylphenyl)methylphosphine sulfide **22**

$^{31}\text{P}\{^1\text{H}\}$  NMR ( $\text{CDCl}_3$ , 81 MHz)

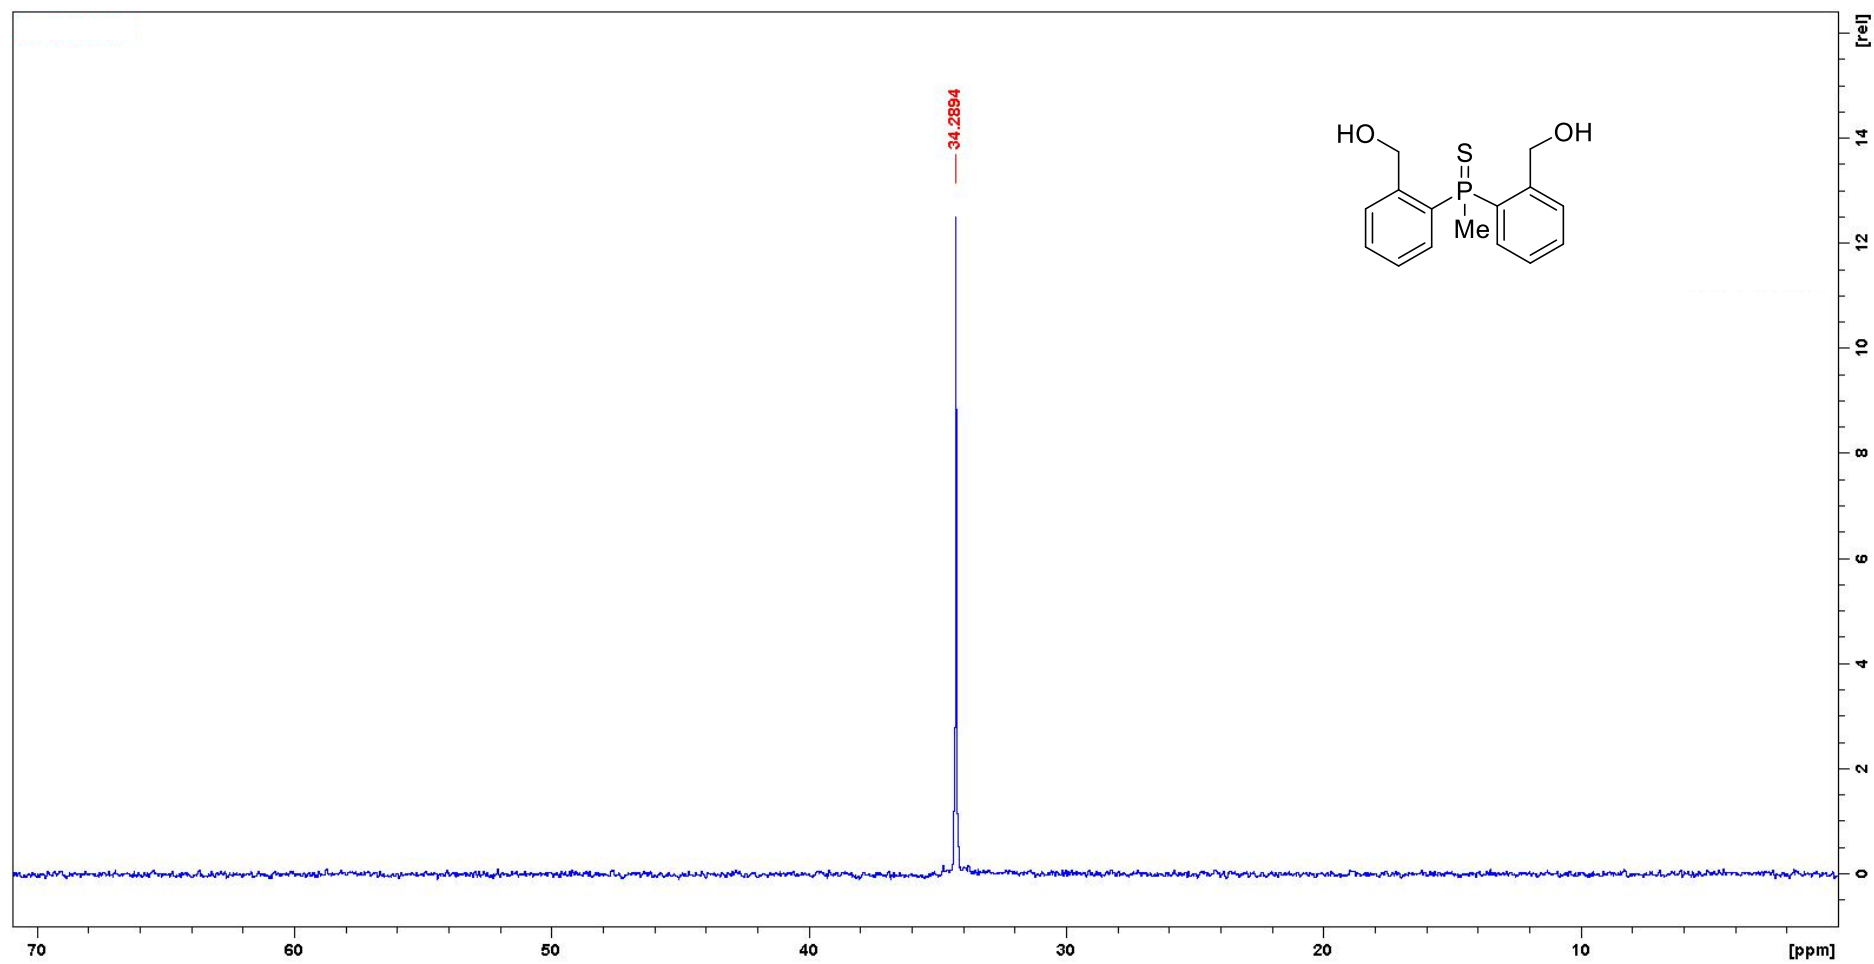

Bis(2-hydroxymethylphenyl)methylphosphine sulfide **22**

$^1\text{H}$  NMR ( $\text{CDCl}_3$ , 200 MHz)

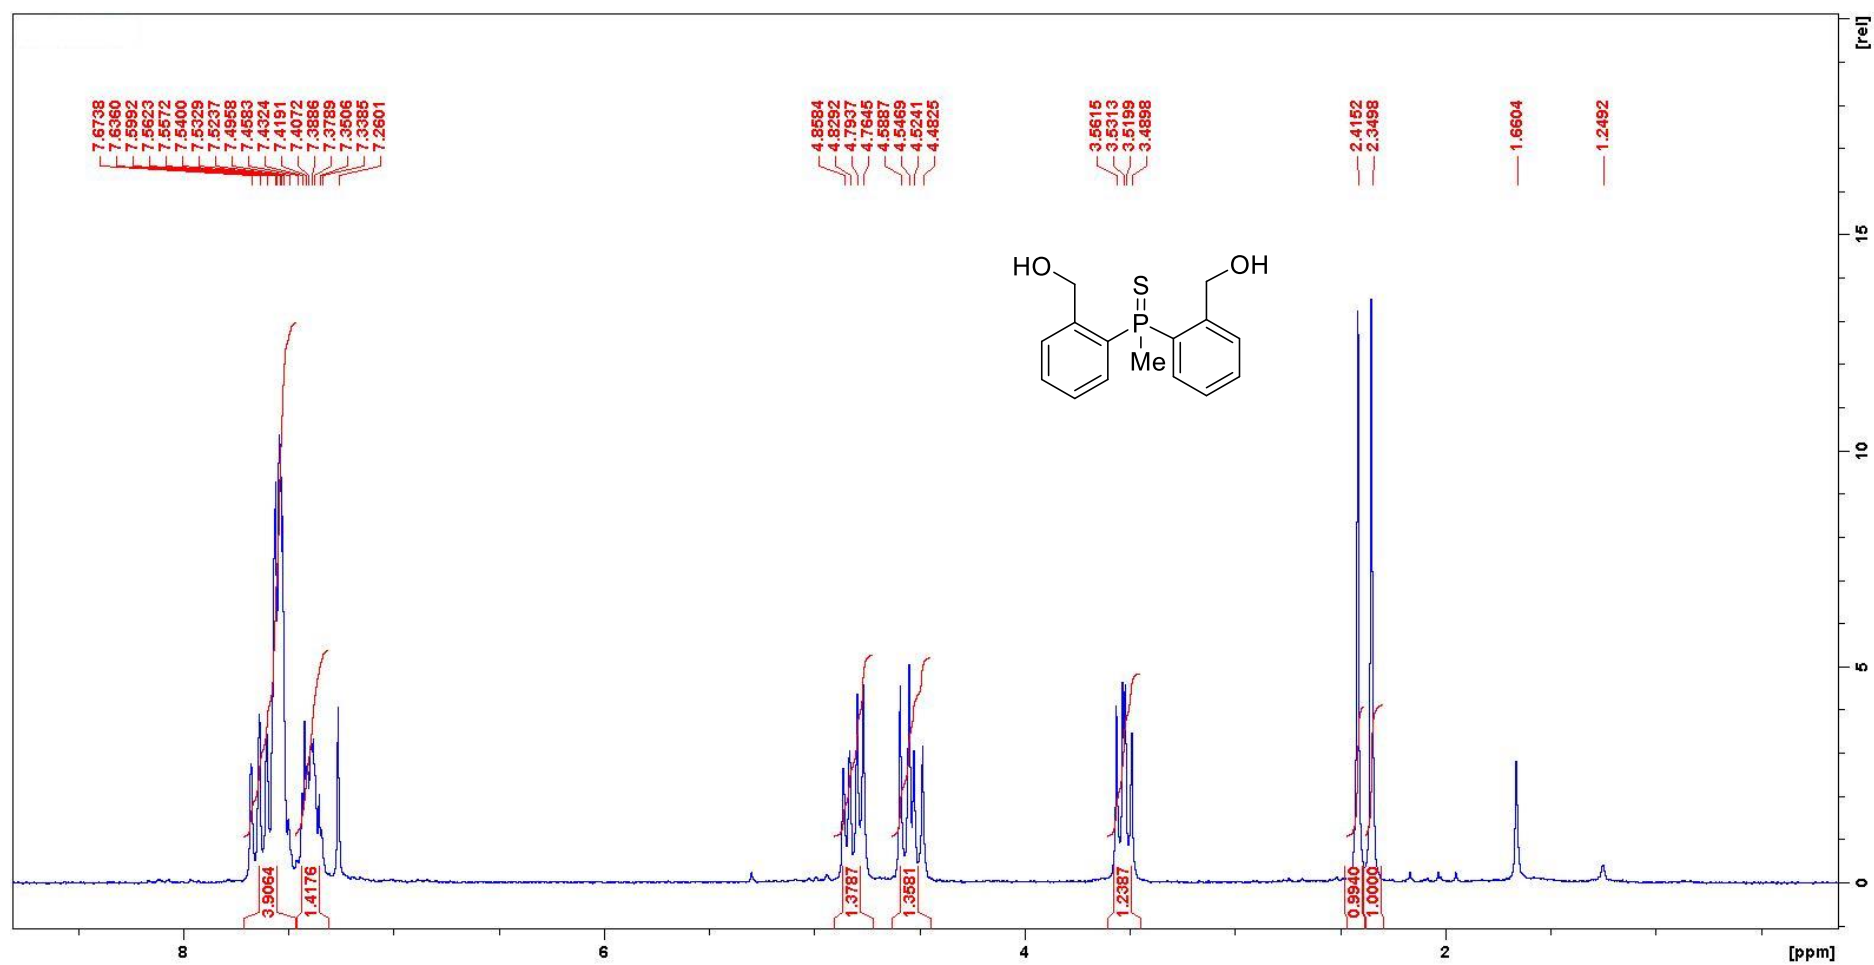

Bis(2-hydroxymethylphenyl)methylphosphine sulfide **22**

$^{13}\text{C}\{^1\text{H}\}$  NMR ( $\text{CDCl}_3$ , 126 MHz)

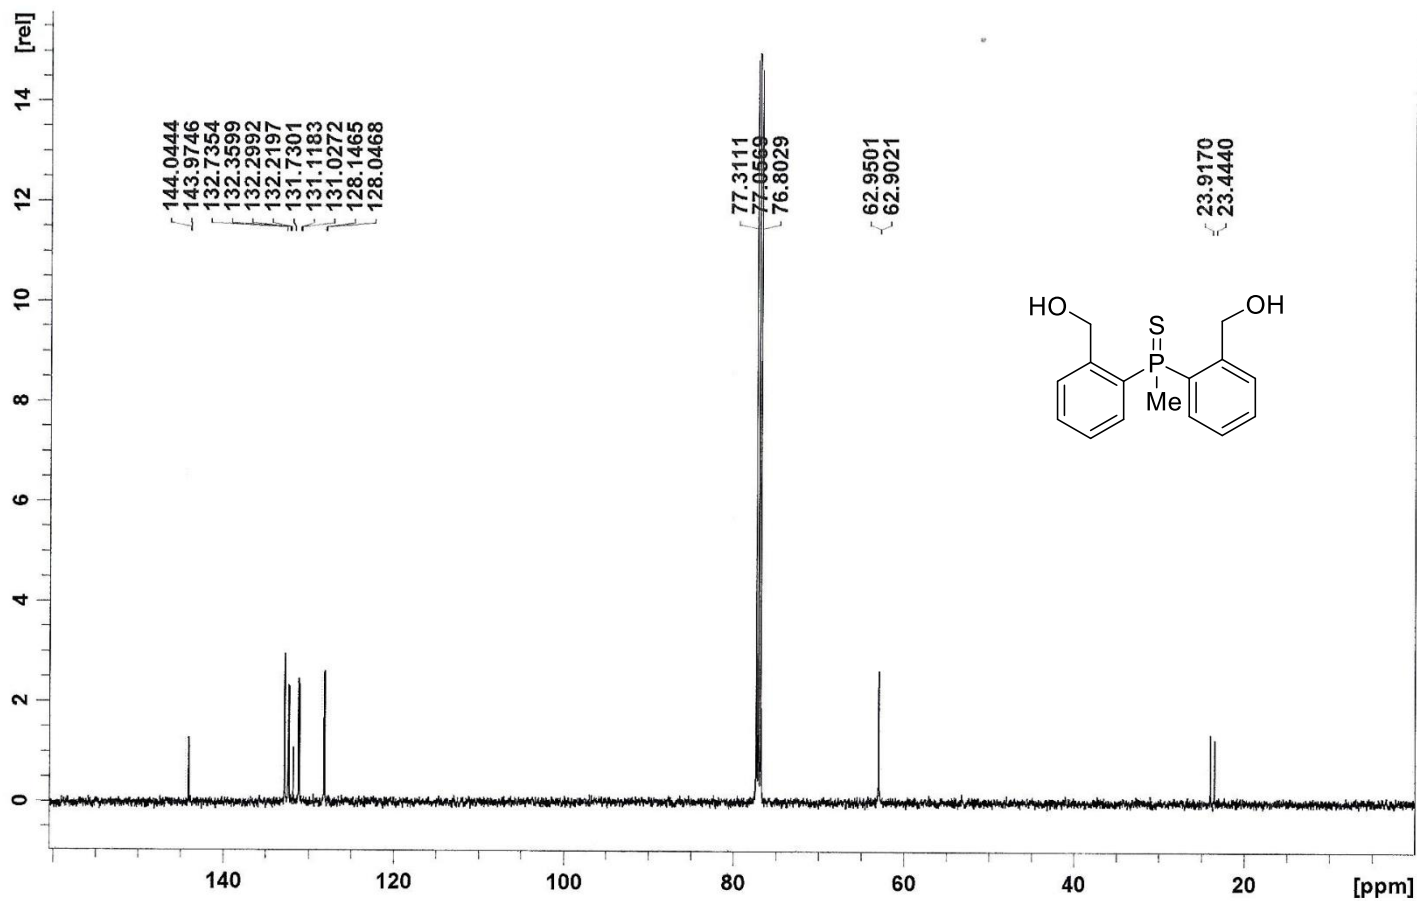



Bis(2-hydroxymethylphenyl)phenylphosphine sulfide **23**

$^{31}\text{P}\{^1\text{H}\}$  NMR ( $\text{CDCl}_3$ , 81 MHz)

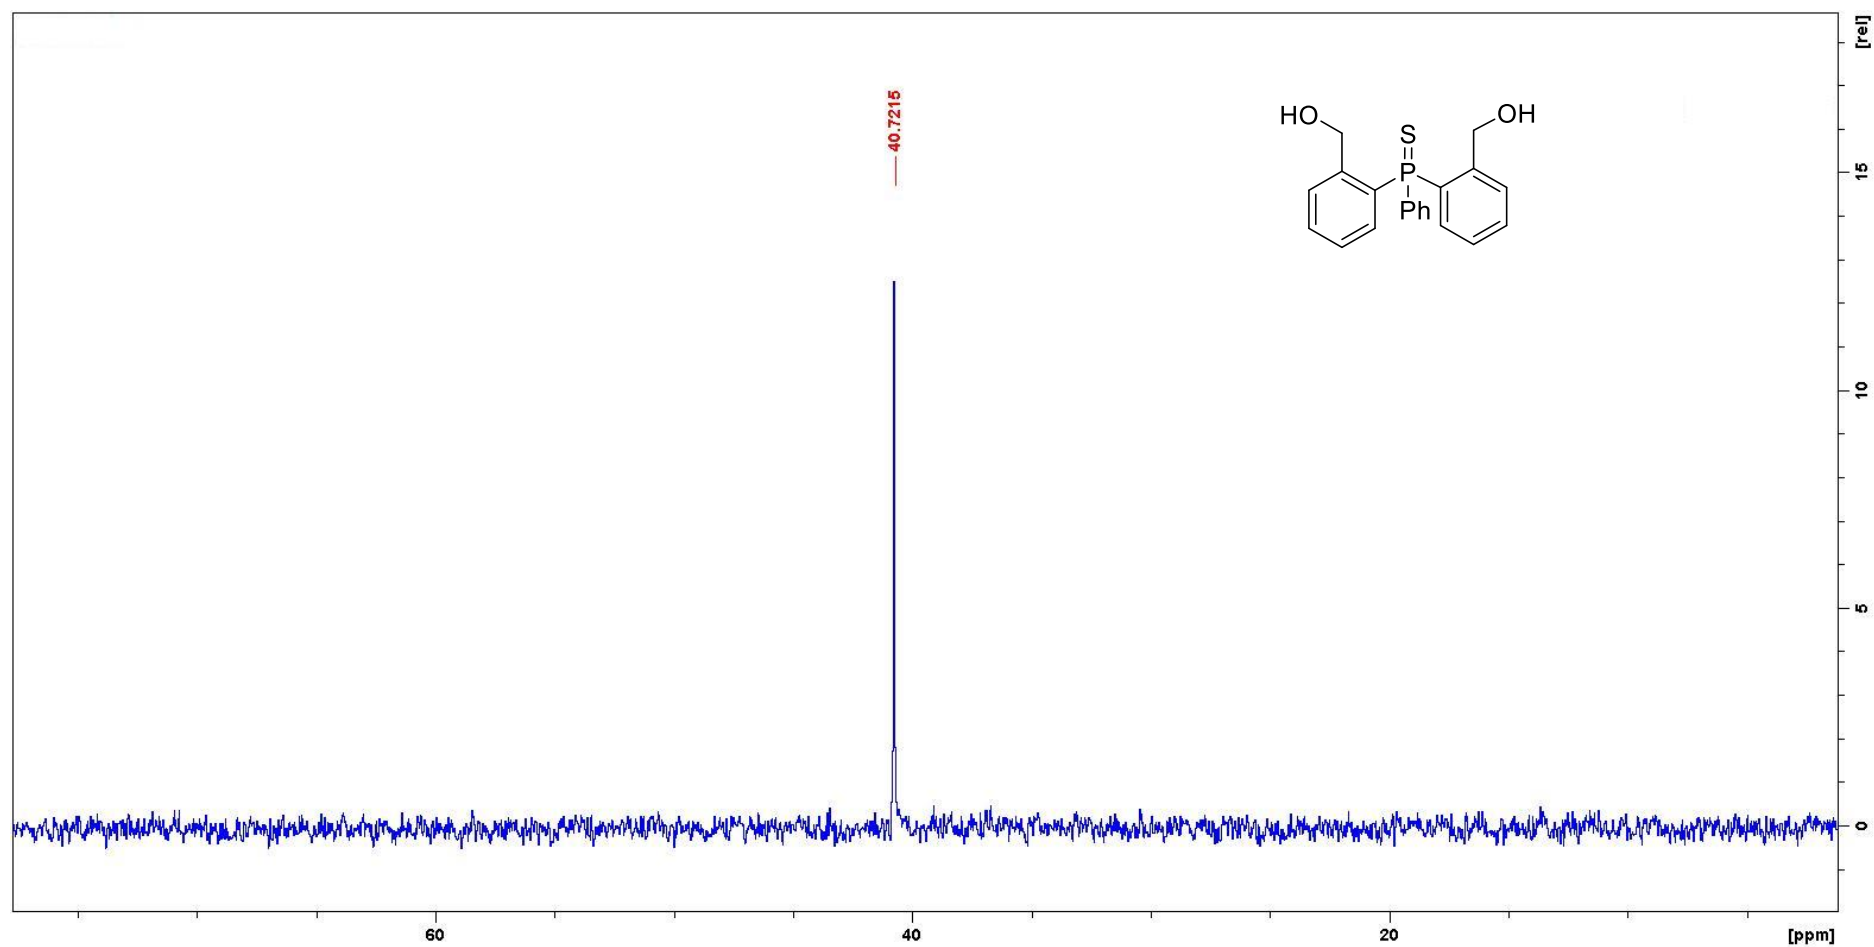

Bis(2-hydroxymethylphenyl)phenylphosphine sulfide **23**

$^1\text{H}$  NMR ( $\text{CDCl}_3$ , 200 MHz)

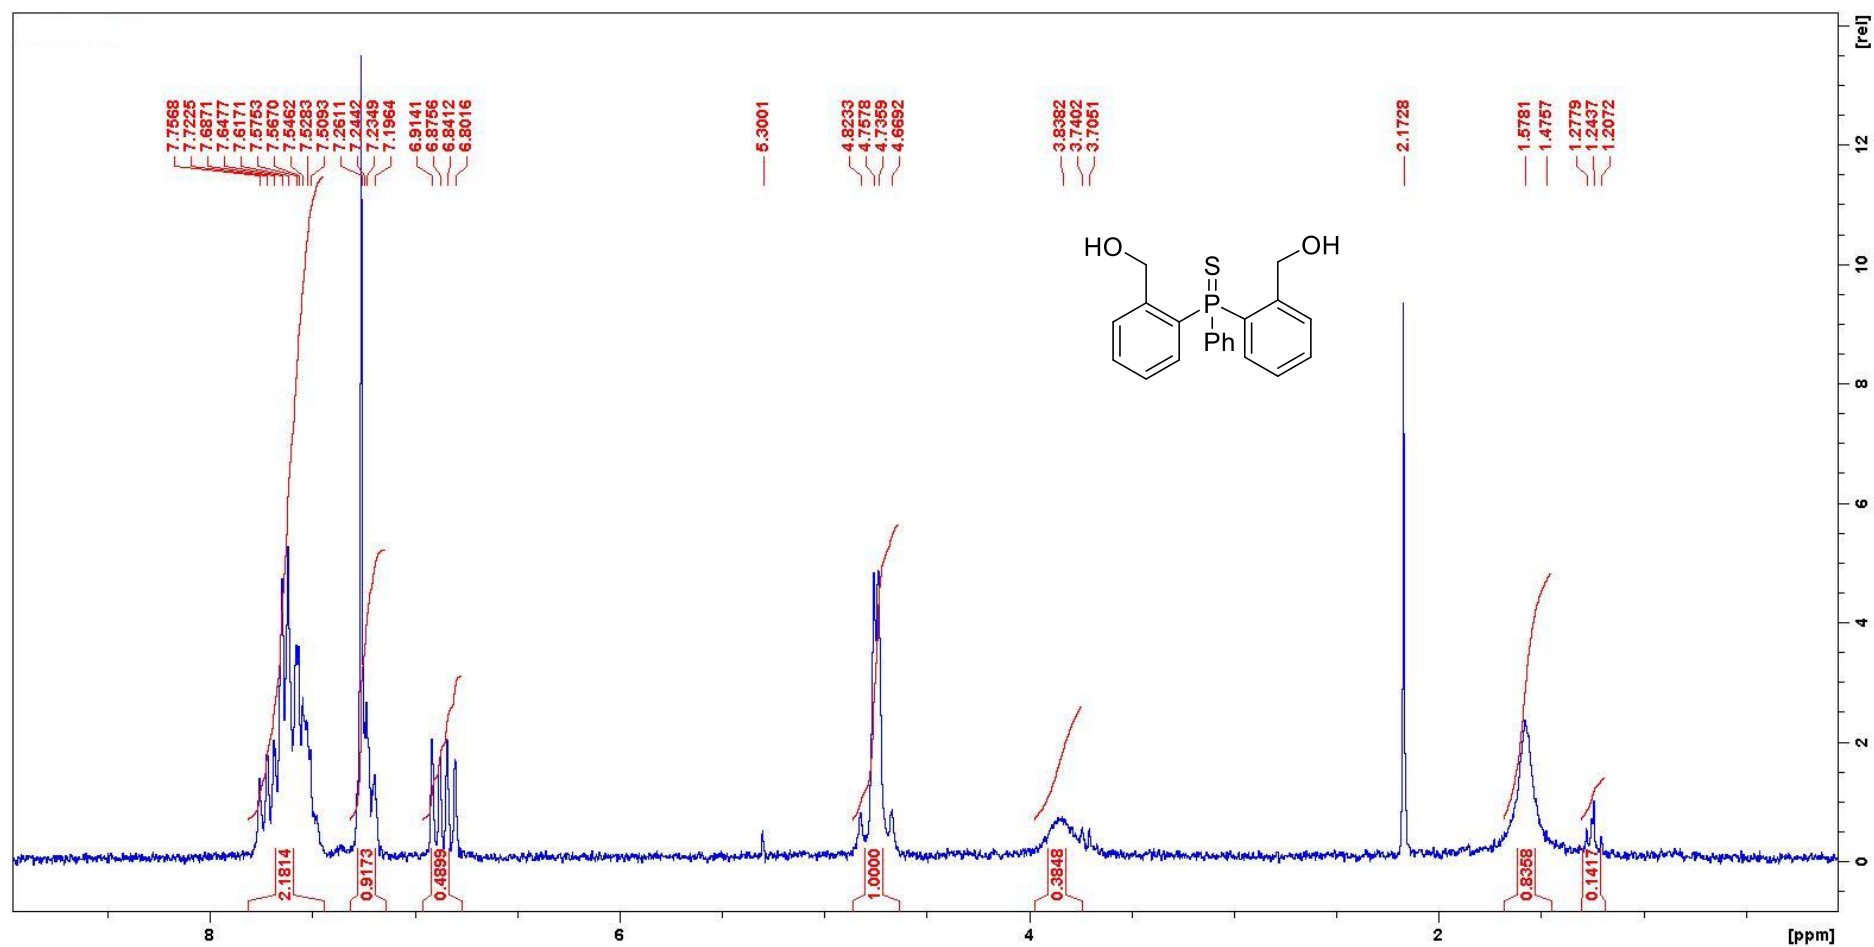

(2-acetoxymethylphenyl)(2'-hydroxymethylphenyl)methylphosphine **14**

$^{31}\text{P}\{^1\text{H}\}$  NMR ( $\text{CDCl}_3$ , 81 MHz)

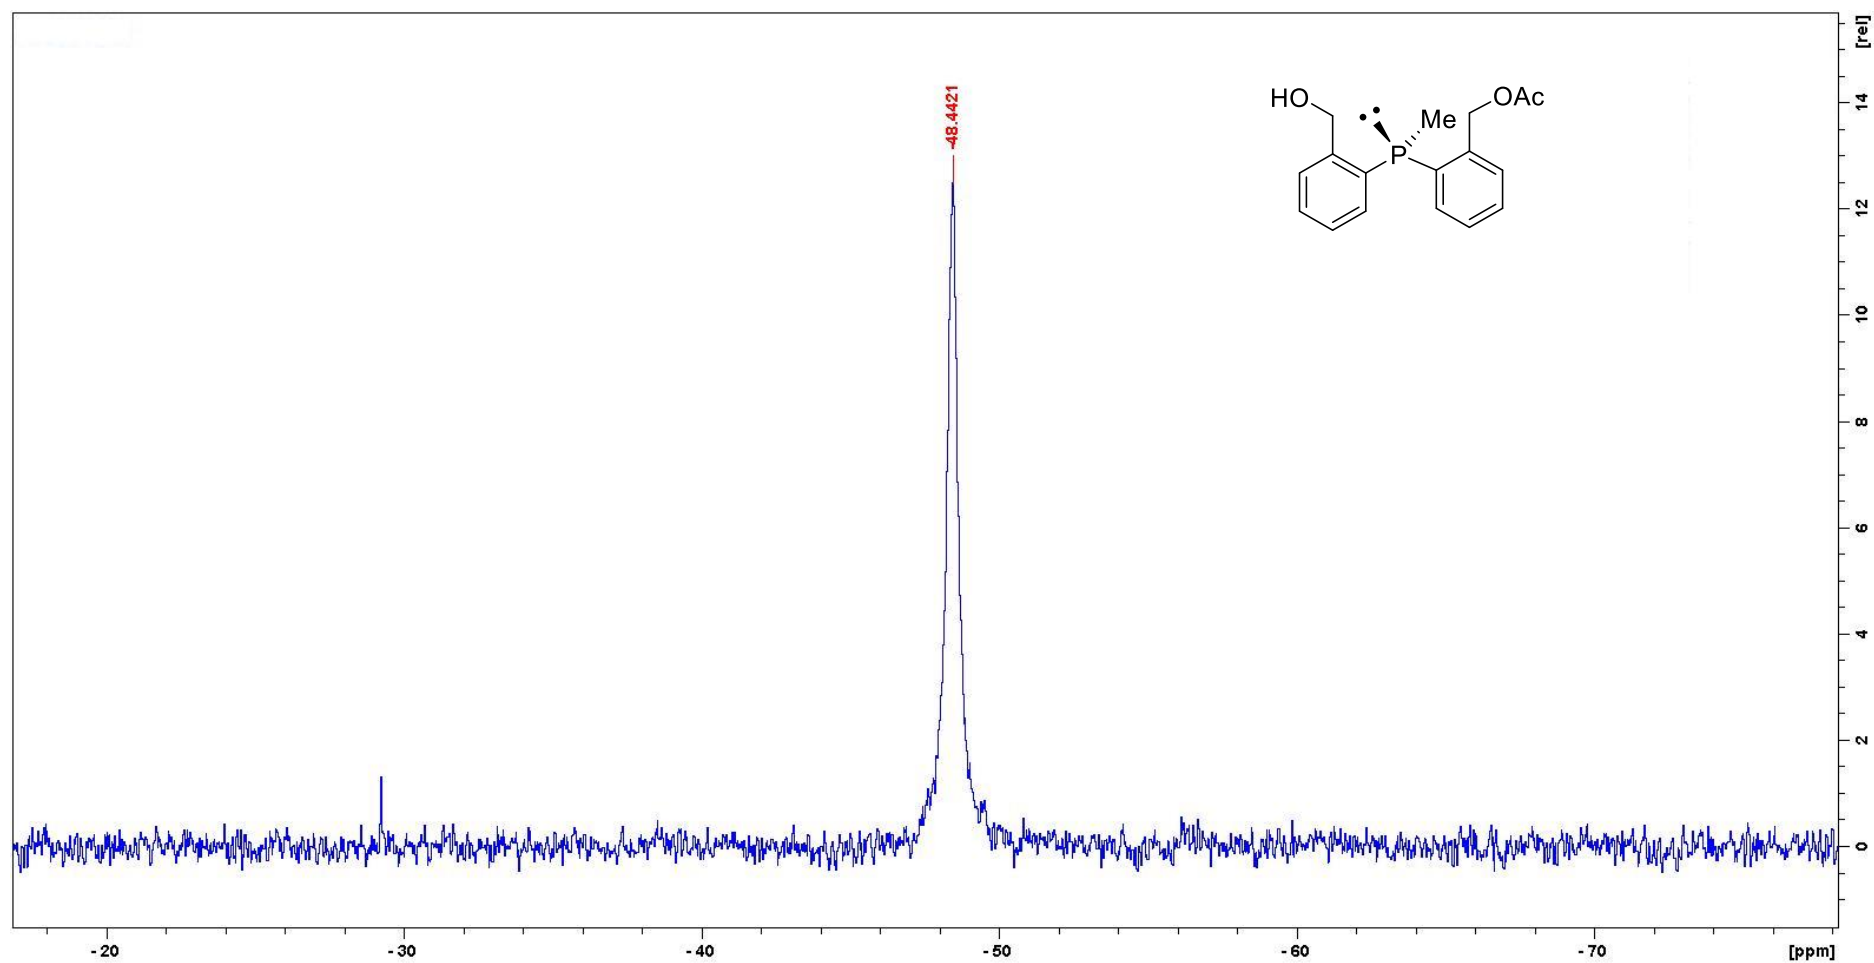

(2-acetoxymethylphenyl)(2'-hydroxymethylphenyl)methylphosphine **14**

$^1\text{H}$  NMR ( $\text{CDCl}_3$ , 200 MHz)

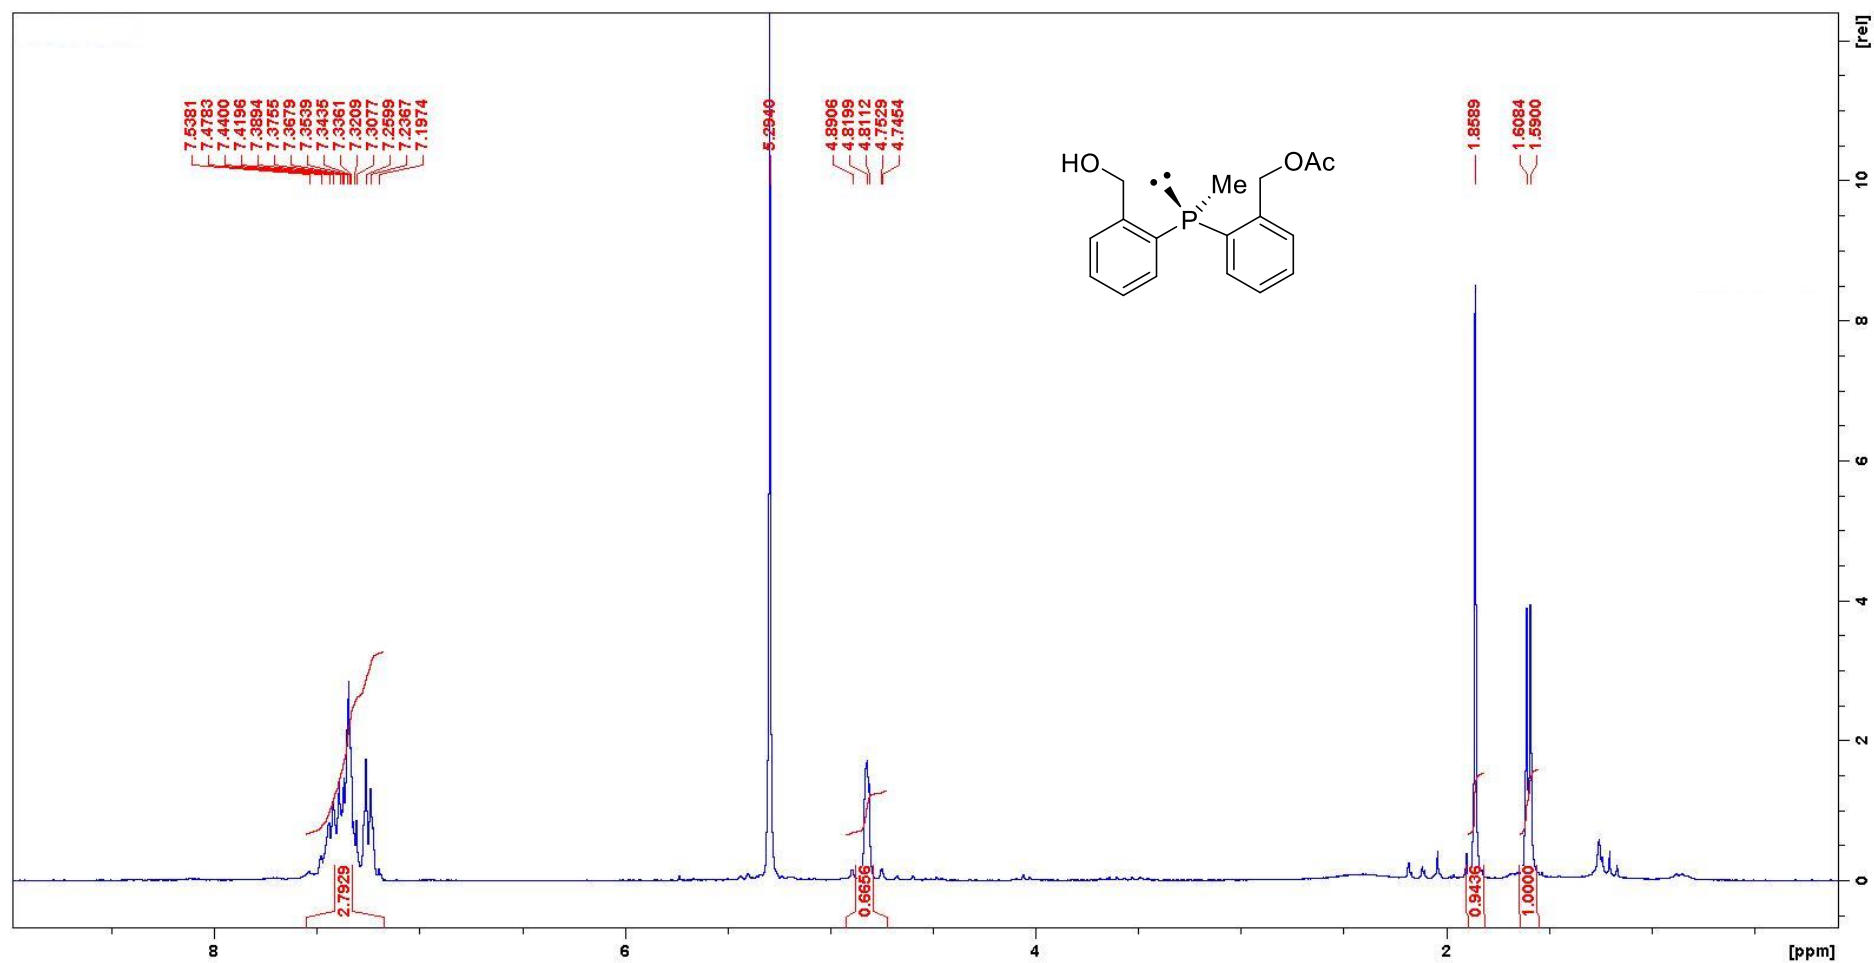

(2-acetoxymethylphenyl)(2'-hydroxymethylphenyl)phenylphosphine **15**

$^{31}\text{P}\{^1\text{H}\}$  NMR ( $\text{CDCl}_3$ , 81 MHz)

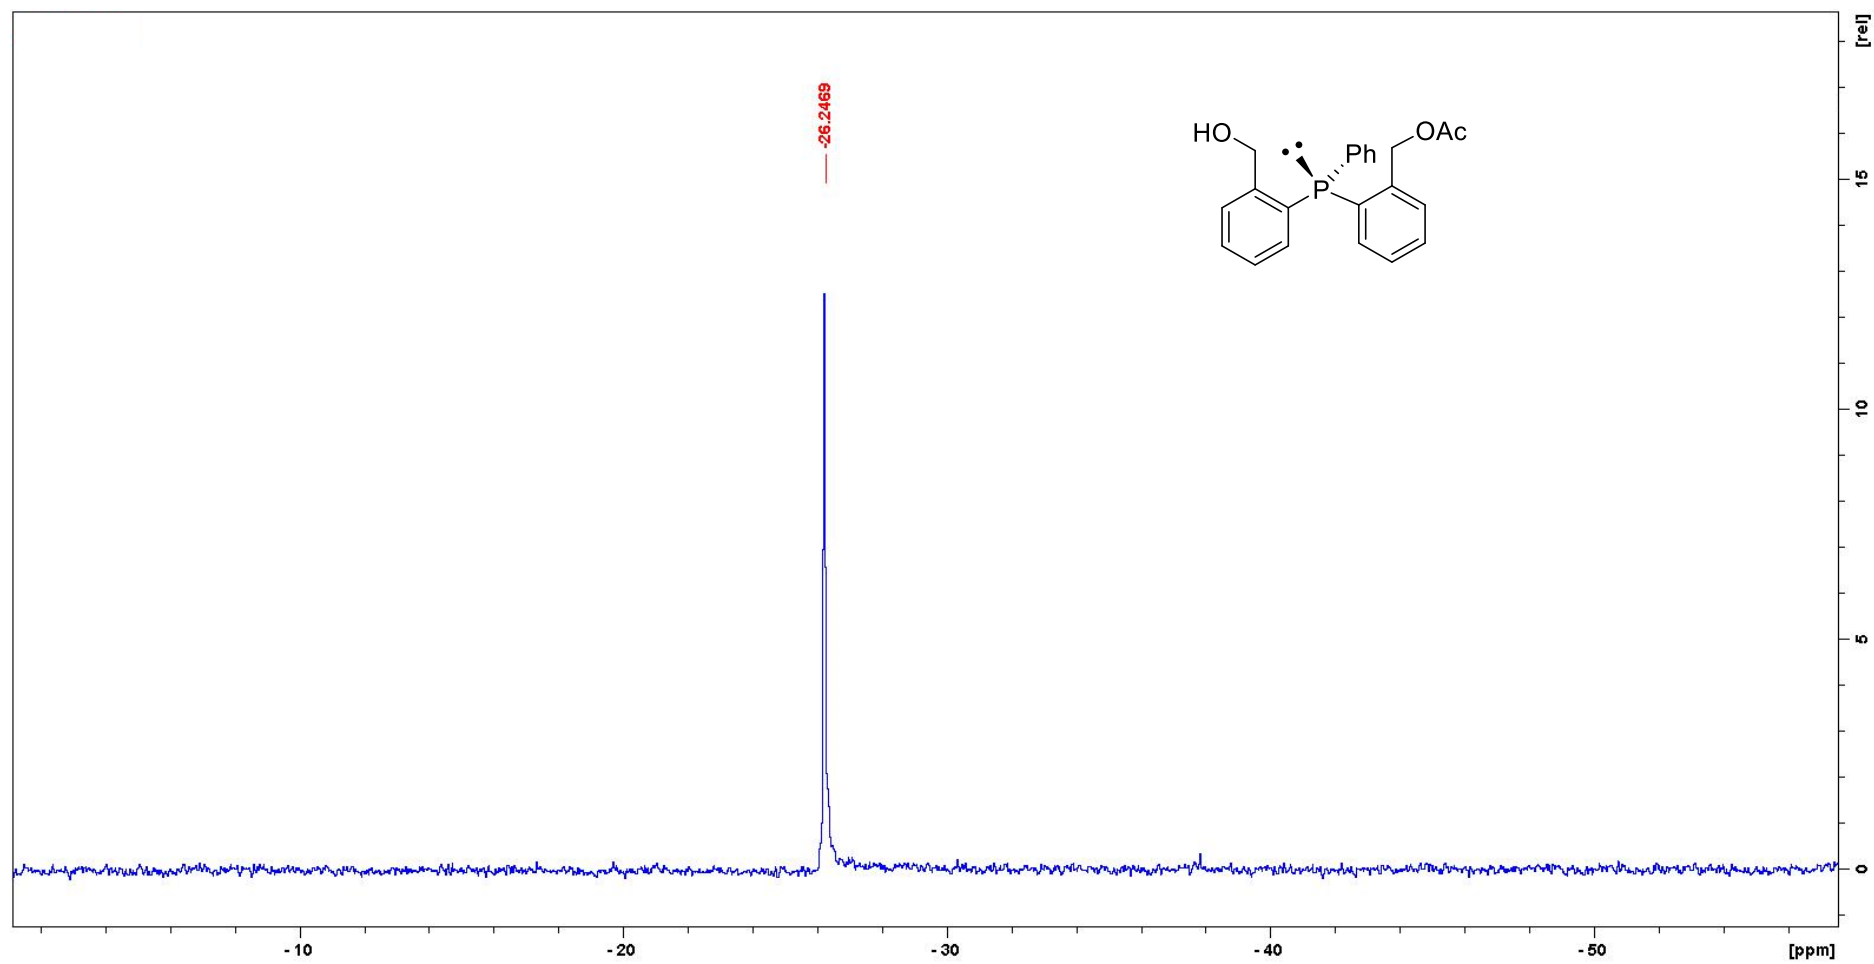

(2-acetoxymethylphenyl)(2'-hydroxymethylphenyl)phenylphosphine **15**

$^1\text{H}$  NMR ( $\text{CDCl}_3$ , 200 MHz)

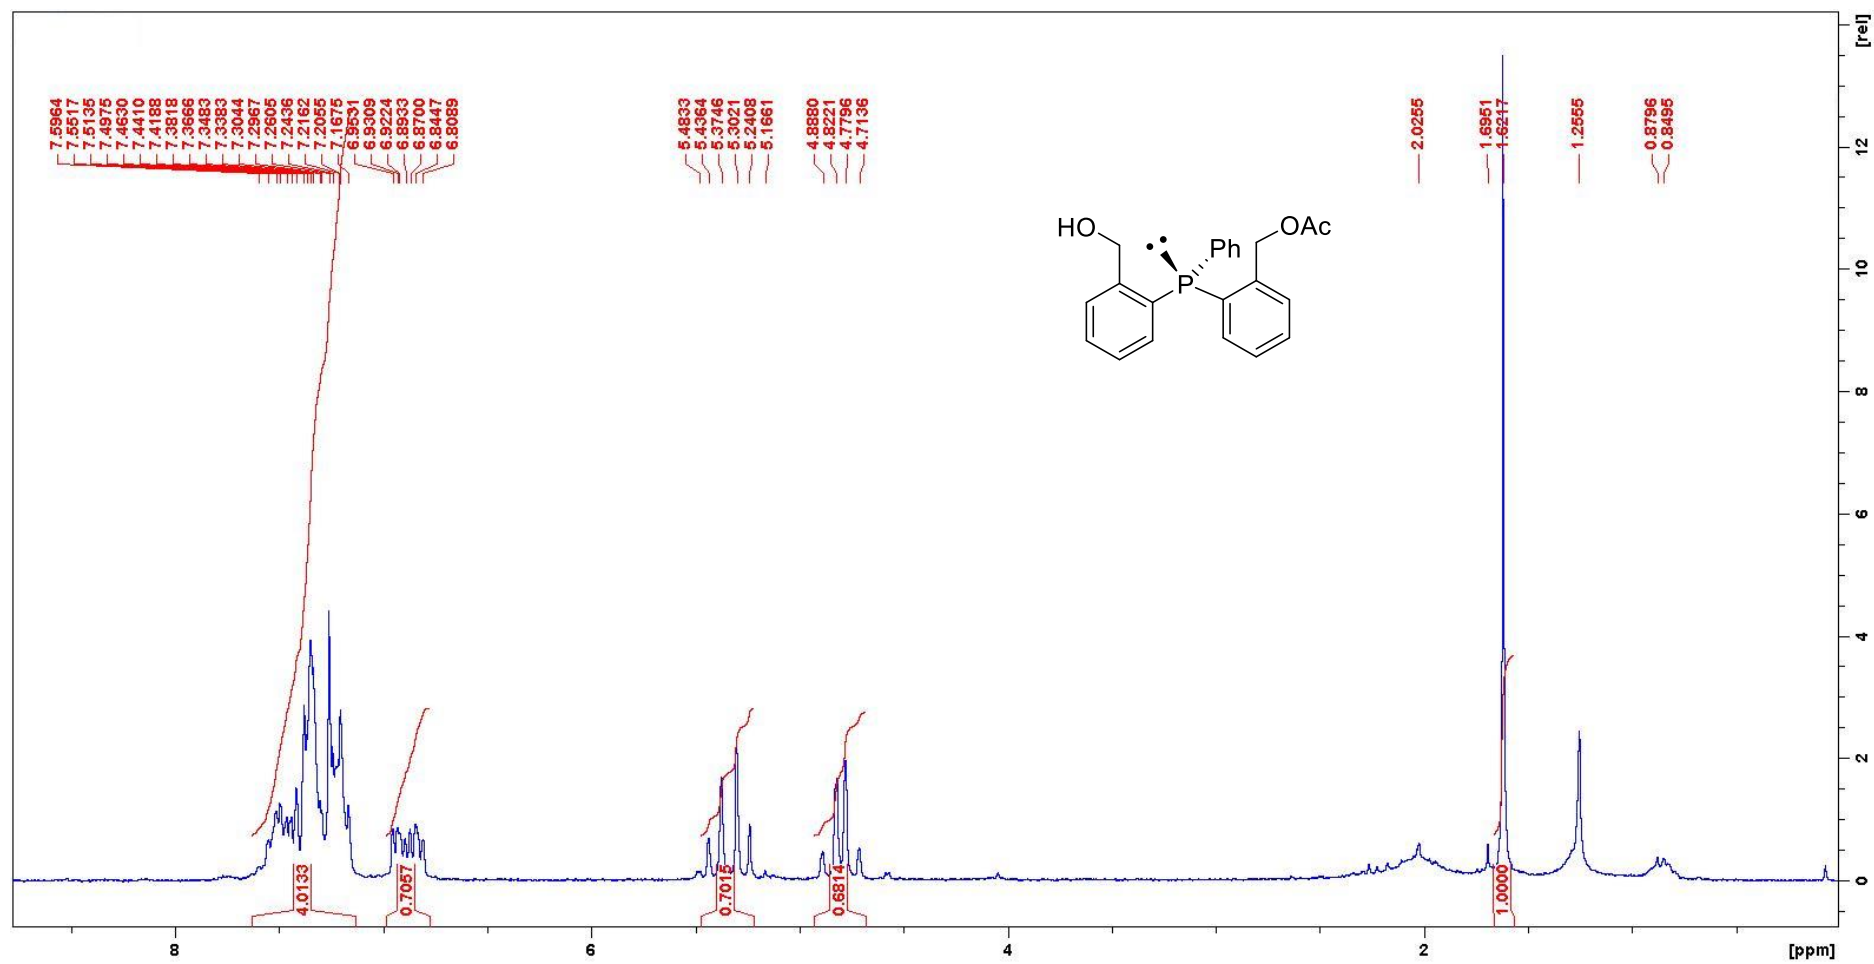

(2-acetoxymethylphenyl)(2'-hydroxymethylphenyl)methylphosphine sulfide **24**

$^{31}\text{P}\{^1\text{H}\}$  NMR ( $\text{CDCl}_3$ , 81 MHz)

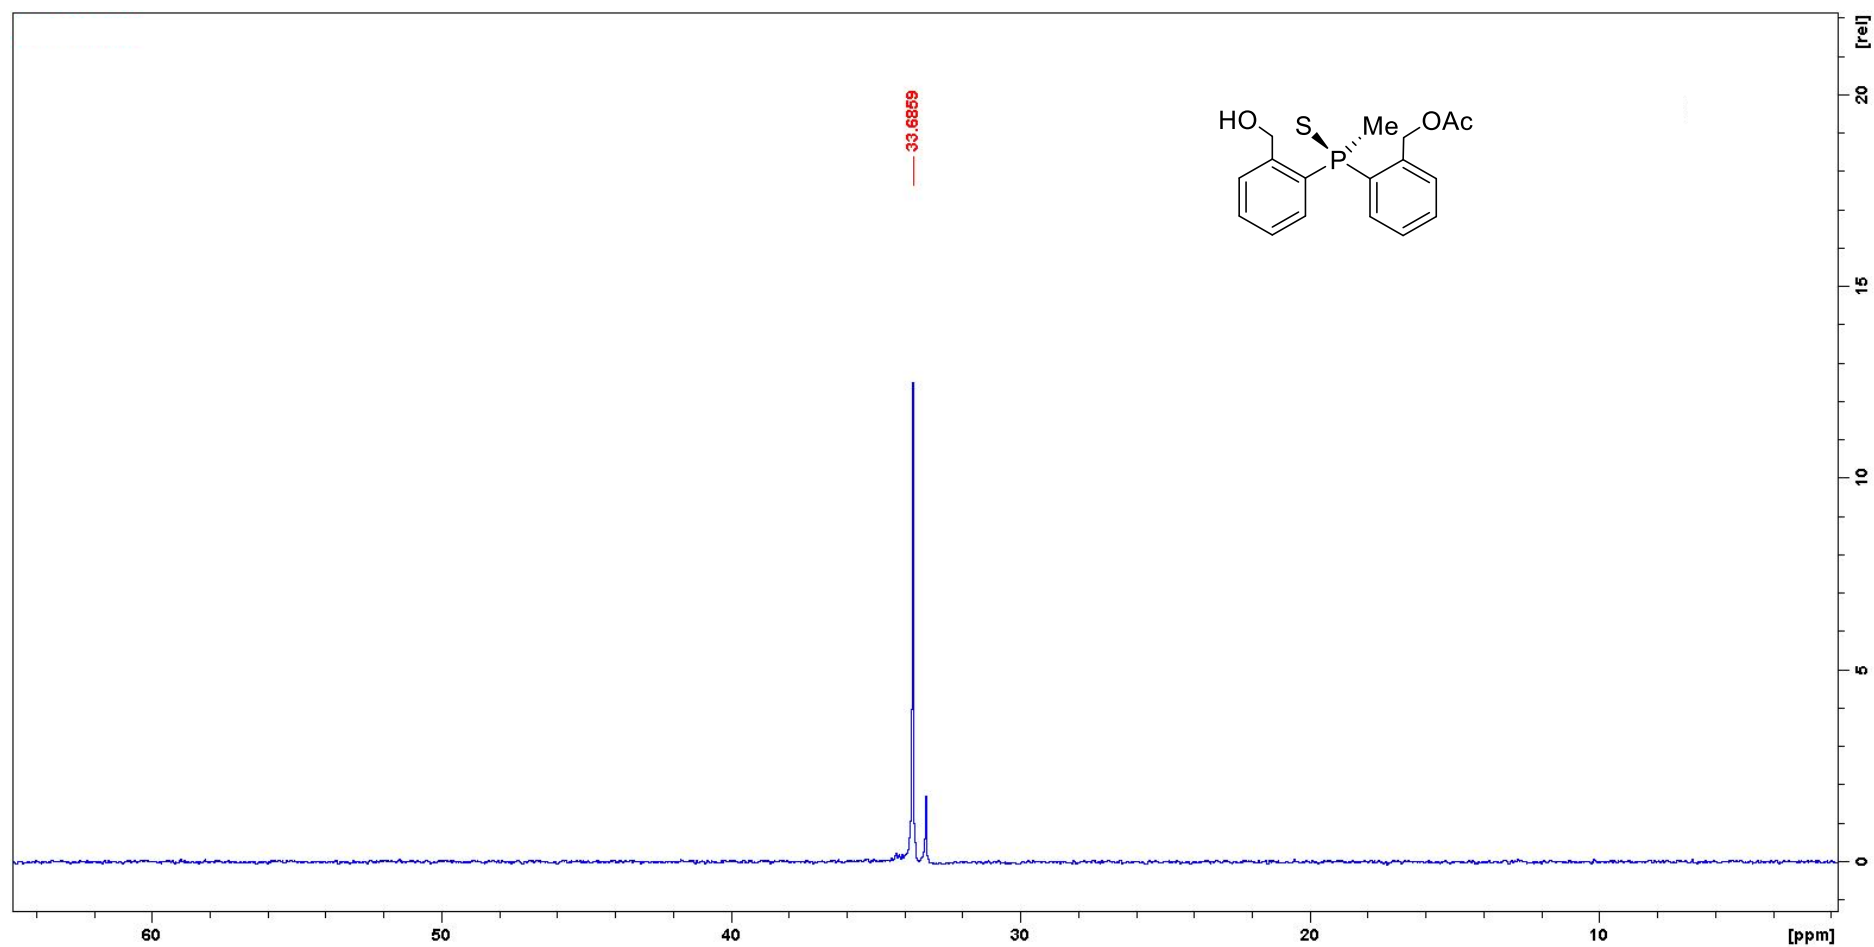

(2-acetoxymethylphenyl)(2'-hydroxymethylphenyl)methylphosphine sulfide **24**

$^1\text{H}$  NMR ( $\text{CDCl}_3$ , 200 MHz)

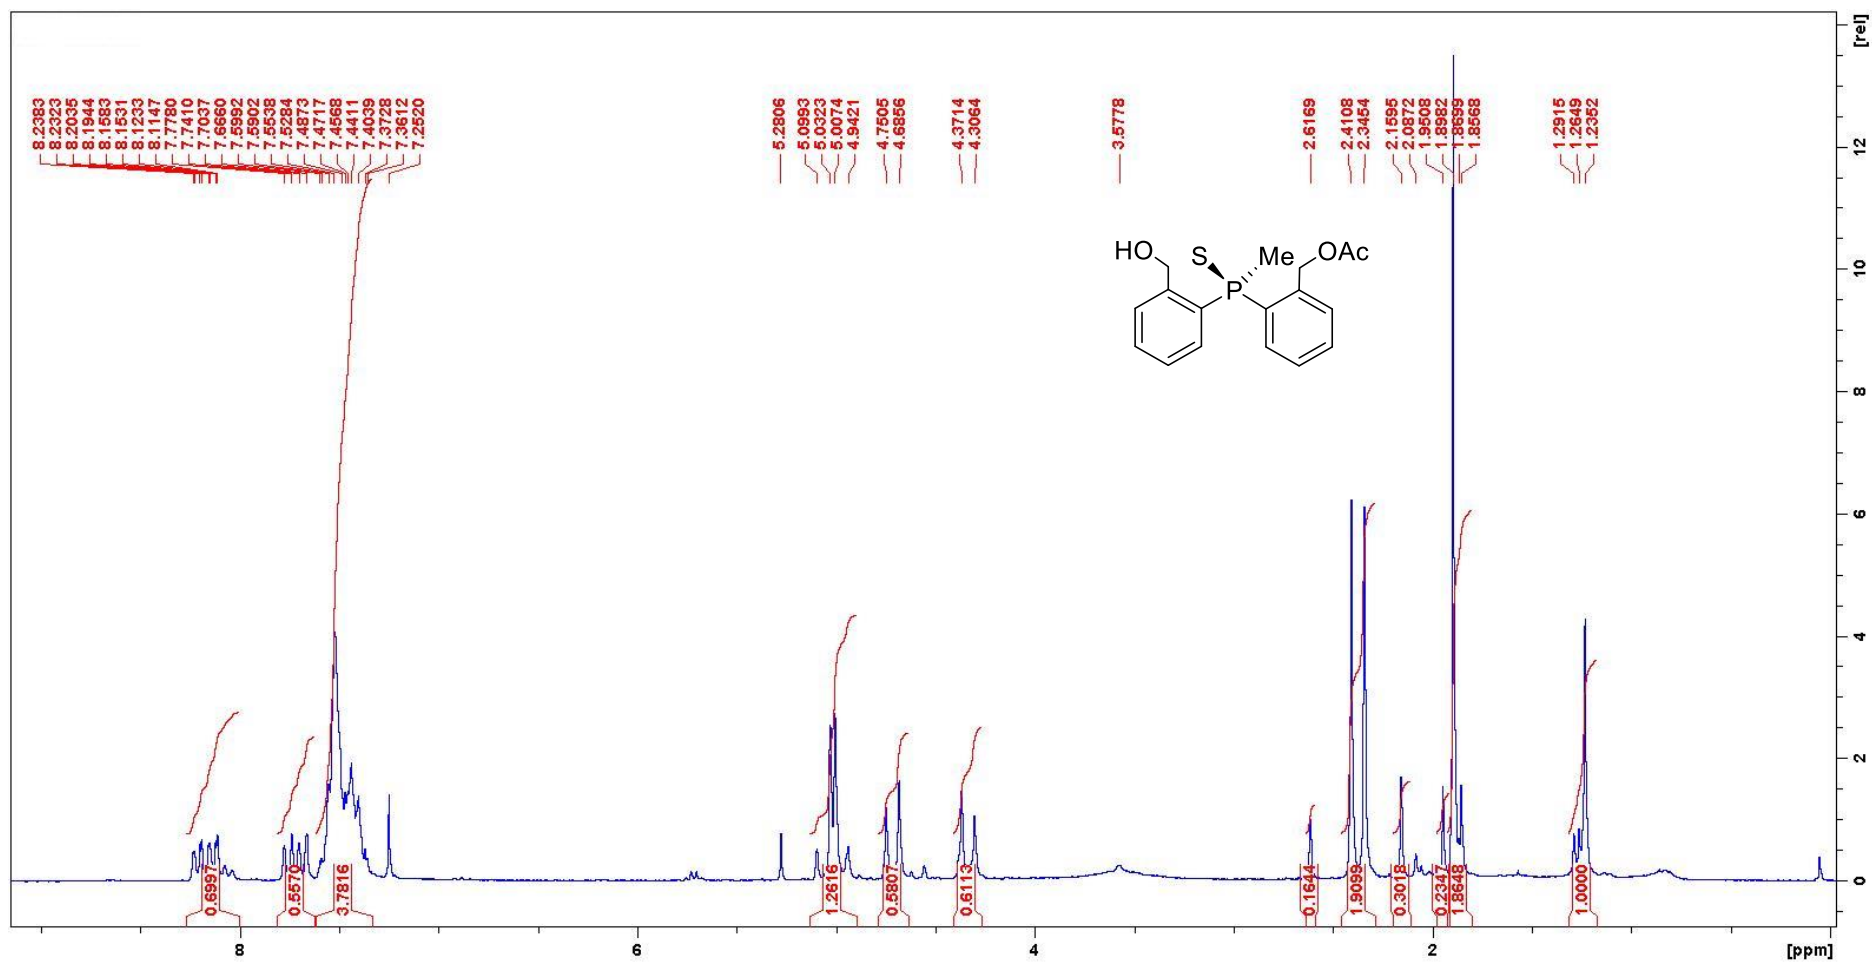



(2-acetoxymethylphenyl)(2'-hydroxymethylphenyl)phenylphosphine sulfide **25**

$^{31}\text{P}\{^1\text{H}\}$  NMR ( $\text{CDCl}_3$ , 81 MHz)

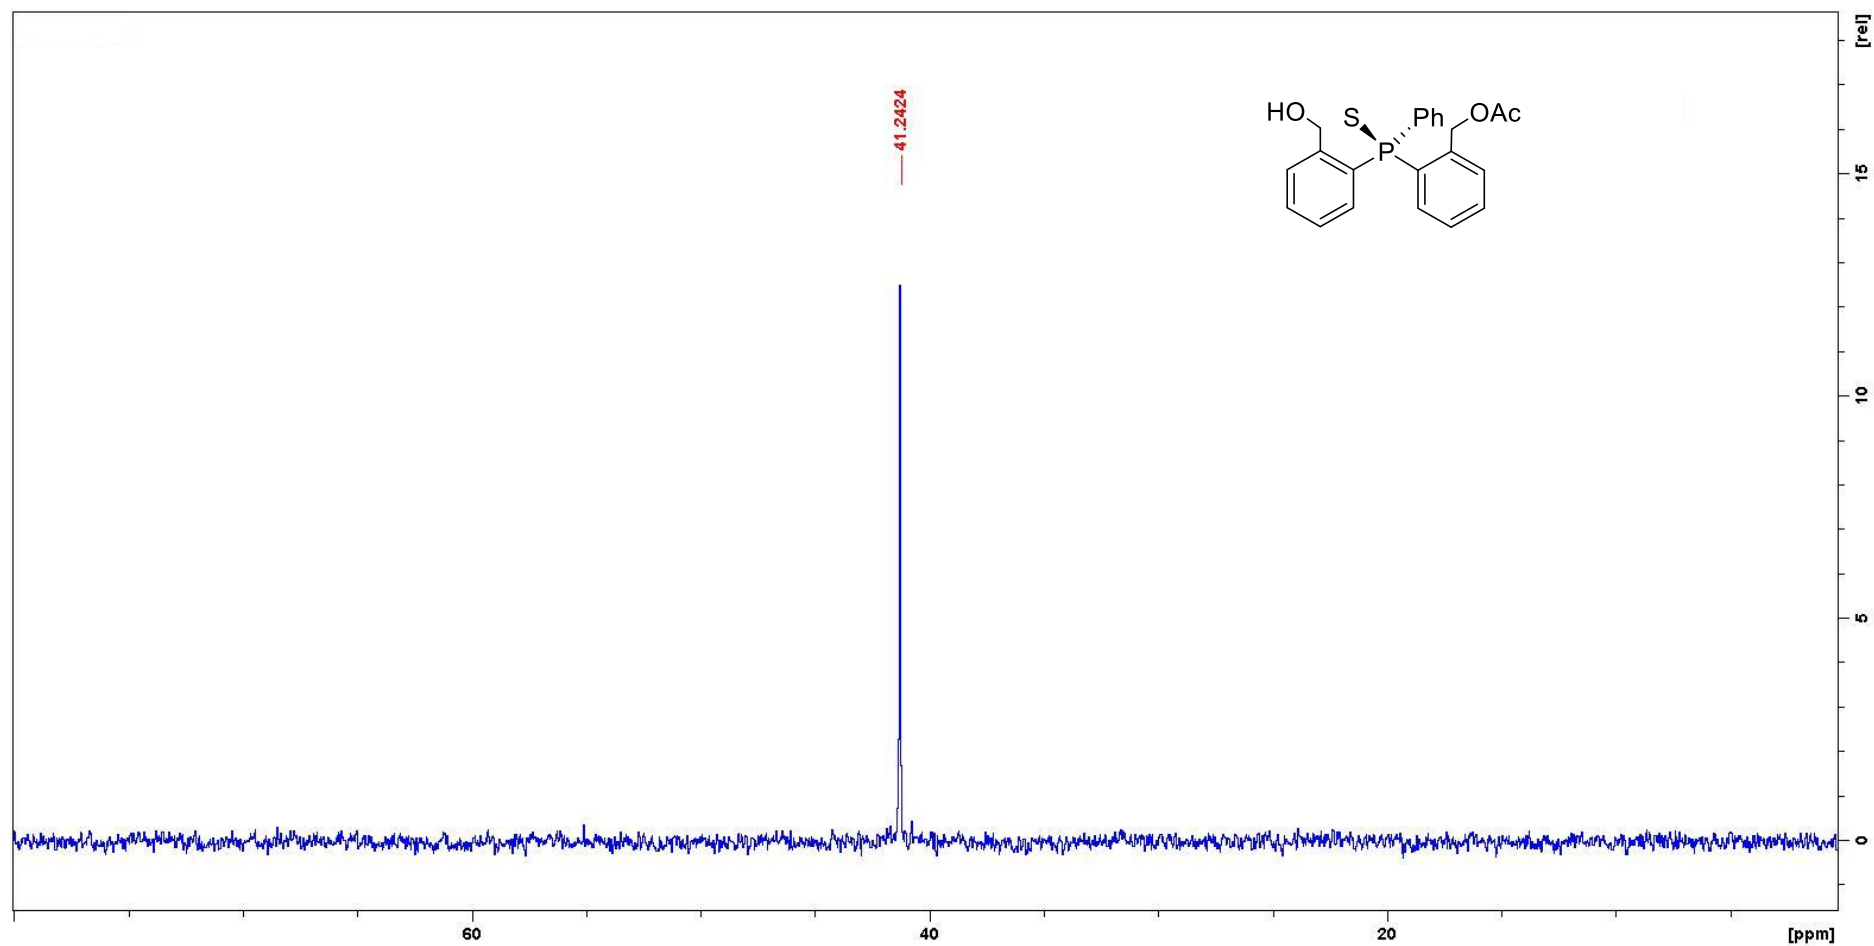

(2-acetoxymethylphenyl)(2'-hydroxymethylphenyl)phenylphosphine sulfide **25**

$^1\text{H}$  NMR ( $\text{CDCl}_3$ , 200 MHz)

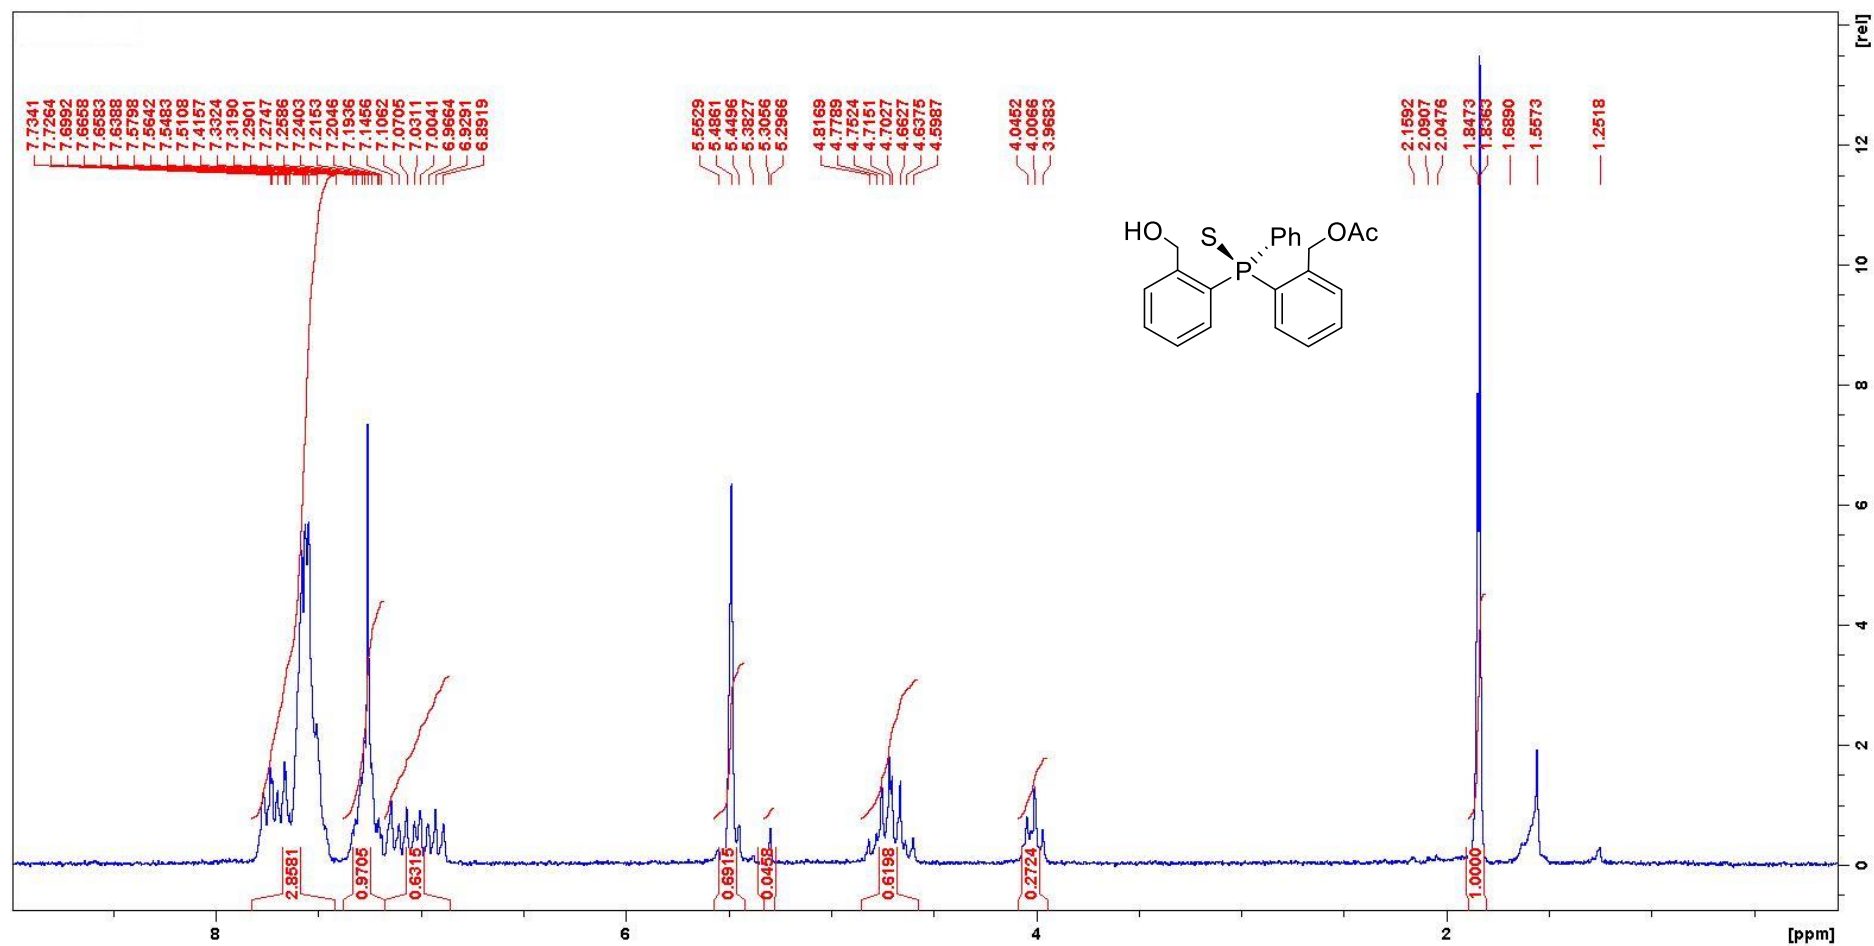

Supplement: s1 [file s1]
